# Supplementary material for: Evidence for non-communicable diseases: analysis of Cochrane reviews and randomised trials by World Bank classification
Source: HighWire-hosted journal article supplement (doi:10.1136/bmjopen-2013-003298), 2013-07-01
Supplement: bmjopen-2013-003298supp_table2.pdf [file bmjopen-2013-003298supp_table2.pdf]

**Web Table 2 Included and Excluded Cochrane disease groups**

| Included Cochrane Groups (18)                  | Excluded Cochrane Groups (44)                             |
|------------------------------------------------|-----------------------------------------------------------|
| Airways                                        | Acute respiratory infection                               |
| Breast cancer                                  | Anaesthesia                                               |
| Colorectal cancer                              | Back                                                      |
| Childhood cancer                               | Bone, joint and muscle trauma                             |
| Ear nose and throat disorders                  | Campbell and Cochrane equity methods                      |
| Gynaecological cancer                          | Child Health                                              |
| Haematological malignancies                    | Comparing multiple interventions methods                  |
| Heart                                          | Complementary medicine                                    |
| Hepatobiliary                                  | Consumers and communication                               |
| Hypertension                                   | Cystic fibrosis and genetic disorders                     |
| Lung cancer                                    | Dementia and cognitive improvement                        |
| Metabolic and endocrine                        | Depressions, anxiety and neurosis                         |
| Oral health                                    | Developmental psychosocial and learning problems          |
| Pain, palliative and supportive care           | Drugs and alcohol                                         |
| Prostatic disease and urologic cancers         | Effective practice and organization of care               |
| Stroke                                         | Epilepsy                                                  |
| Tobacco group                                  | Eyes and vision                                           |
| Upper gastrointestinal and pancreatic diseases | Fertility regulation                                      |
|                                                | Health care of older people                               |
|                                                | HIV/ AIDS                                                 |
|                                                | Incontinence                                              |
|                                                | Infectious diseases                                       |
|                                                | Inflammatory bowel disease and functional bowel disorders |
|                                                | Injuries                                                  |
|                                                | Menstrual disorders and subfertility                      |
|                                                | Methodology                                               |
|                                                | Movement disorders                                        |
|                                                | Multiple Sclerosis                                        |
|                                                | Musculoskeletal                                           |
|                                                | Neonatal                                                  |
|                                                | Neurological                                              |
|                                                | Neuromuscular disease                                     |
|                                                | Non-randomised studies methods                            |
|                                                | Nursing care                                              |
|                                                | Occupational safety and health                            |
|                                                | Peripheral vascular diseases                              |
|                                                | Pregnancy and childbirth                                  |
|                                                | Primary health care                                       |
|                                                | Public health                                             |
|                                                | Renal                                                     |
|                                                | Schizophrenia                                             |
|                                                | Sexually transmitted diseases                             |
|                                                | Skin                                                      |
|                                                | Wounds                                                    |
