# Supplementary material for: Evidence for non-communicable diseases: analysis of Cochrane reviews and randomised trials by World Bank classification
Source: HighWire-hosted journal article supplement (doi:10.1136/bmjopen-2013-003298), 2013-07-01
Supplement: bmjopen-2013-003298supp_table3.pdf [file bmjopen-2013-003298supp_table3.pdf]

**Web Table 3: Country of corresponding author of 797 Cochrane NCD reviews**

| Country of corresponding Cochrane author | Number of included reviews (n) | Proportion of included reviews (%) |
|------------------------------------------|--------------------------------|------------------------------------|
| Argentina                                | 7                              | .9                                 |
| Australia                                | 77                             | 9.7                                |
| Austria                                  | 5                              | .6                                 |
| Bahrain                                  | 1                              | .1                                 |
| Belgium                                  | 1                              | .1                                 |
| Brazil                                   | 12                             | 1.5                                |
| Canada                                   | 61                             | 7.7                                |
| Chile                                    | 1                              | .1                                 |
| China                                    | 37                             | 4.6                                |
| Columbia                                 | 2                              | .3                                 |
| Costa Rica                               | 1                              | .1                                 |
| Cuba                                     | 1                              | .1                                 |
| Denmark                                  | 17                             | 2.1                                |
| France                                   | 4                              | .5                                 |
| Gambia                                   | 1                              | .1                                 |
| Germany                                  | 31                             | 3.9                                |
| Hong Kong                                | 2                              | .3                                 |
| Hungary                                  | 2                              | .3                                 |
| India                                    | 1                              | .1                                 |
| Iran                                     | 2                              | .3                                 |
| Ireland                                  | 11                             | 1.4                                |
| Israel                                   | 9                              | 1.1                                |
| Italy                                    | 21                             | 2.6                                |
| Japan                                    | 2                              | .3                                 |
| Malaysia                                 | 2                              | .3                                 |
| Netherlands                              | 40                             | 5.0                                |
| New Zealand                              | 14                             | 1.8                                |
| Norway                                   | 4                              | .5                                 |
| Pakistan                                 | 2                              | .3                                 |
| Poland                                   | 1                              | .1                                 |
| Portugal                                 | 1                              | .1                                 |
| Russia                                   | 1                              | .1                                 |
| Singapore                                | 3                              | .4                                 |
| South Africa                             | 5                              | .6                                 |
| South Korea                              | 1                              | .1                                 |
| Spain                                    | 15                             | 1.9                                |
| Sweden                                   | 2                              | .3                                 |
| Switzerland                              | 8                              | 1.0                                |
| Taiwan                                   | 1                              | .1                                 |
| Thailand                                 | 3                              | .4                                 |
| Turkey                                   | 1                              | .1                                 |
| UK                                       | 327                            | 41.0                               |
| Uruguay                                  | 2                              | .3                                 |
| USA                                      | 54                             | 6.8                                |
| Venezuela                                | 1                              | .1                                 |
